# Supplementary material for: Amino acid inspired microscale organization of metallic nanocrystals
Source: Royal Society of Chemistry journal article supplement (doi:10.1039/c3ta13540c), 2013-10-24
Supplement: c3ta13540c.pdf [file c3ta13540c.pdf]

Electronic Supplementary Information

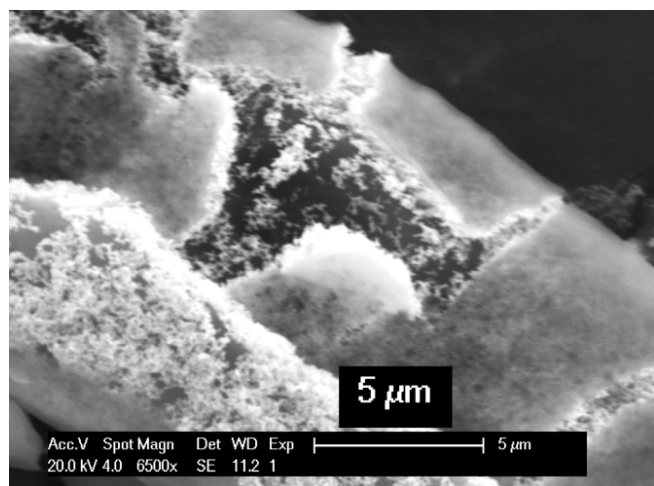

Figure S1: Figure showing the broken tubular morphology of the Pt-alanine micro assembled structure (synthesized by reduction in the absence of stirring)

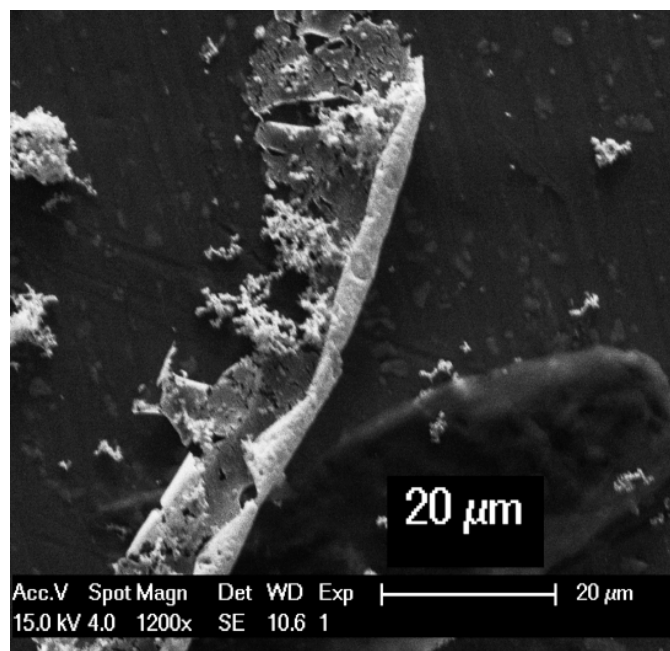

Figure S2: Figure shows the slice of a tube without any carbon-skeleton clearly evidencing the connectivity of the platinum structure.

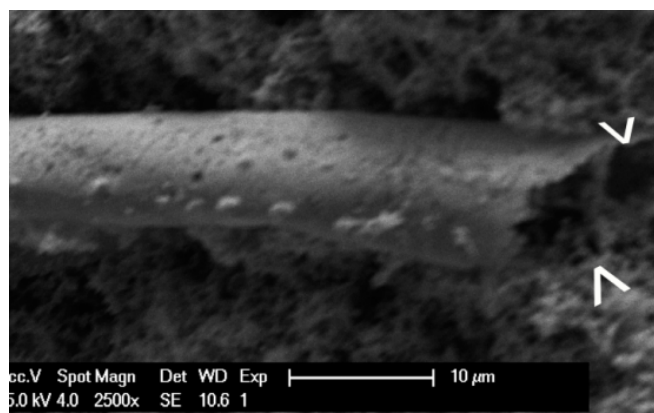

Figure S3: Figure shows a hollow tube of platinum

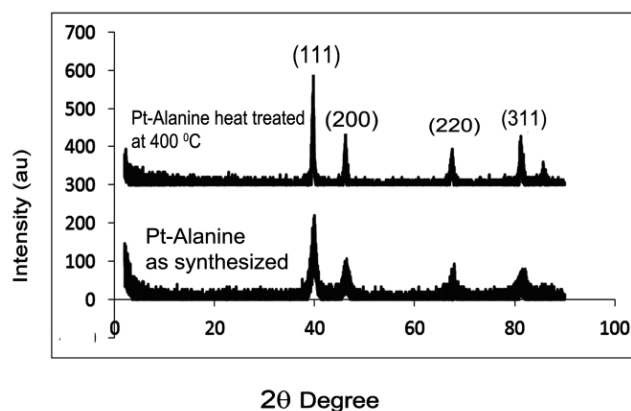

Figure S4 XRD patterns of Pt-alanine superstructures before and after heat-treatment

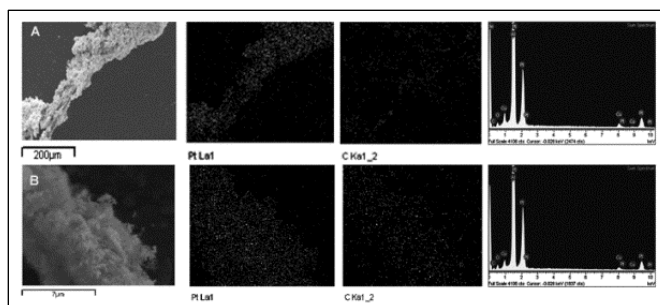

Figure S5: EDS based smart maps of (A) as-synthesized and (B) heat treated platinum-alanine superstructures in conjunction with the corresponding spectra (synthesized by reduction in the absence of stirring)
